# Supplementary material for: Synthesis of a series of biodegradable poly(butylene carbonate-co-isophthalate) random copolymers derived from CO2-based comonomers for sustainable packaging
Source: Royal Society of Chemistry journal article supplement (doi:10.1039/d0gc01549k), 2020-01-01
Supplement: d0gc01549k8.pdf [file d0gc01549k8.pdf]

| Sample  | [BC]/[BI]<br>in polymer | $L_n$ BC | $L_n$ BI | R    |
|---------|-------------------------|----------|----------|------|
| PBC     | 100/0                   | -        | -        | -    |
| PBCI 20 | 79.8/20.2               | 4.64     | 1.21     | 1.03 |
|         | 80.2/19.8               | 4.61     | 1.20     | 1.01 |
| PBCI 40 | 59.1/40.9               | 2.45     | 1.68     | 1.00 |
|         | 59.6/40.4               | 2.47     | 1.68     | 1.00 |
| PBCI 60 | 39.4/60.6               | 1.73     | 2.38     | 1.00 |
|         | 42.1/57.9               | 1.72     | 2.35     | 1.00 |
| PBCI 80 | 15.4/84.6               | 1.18     | 5.67     | 1.03 |
|         | 17.4/82.6               | 1.19     | 6.14     | 1.00 |
| PBI     | 100/0                   | -        | -        | -    |
