# Supplementary figures and images for: Synthesis of a series of biodegradable poly(butylene carbonate-co-isophthalate) random copolymers derived from CO2-based comonomers for sustainable packaging
Source: Royal Society of Chemistry journal article supplement (doi:10.1039/d0gc01549k), 2020-01-01

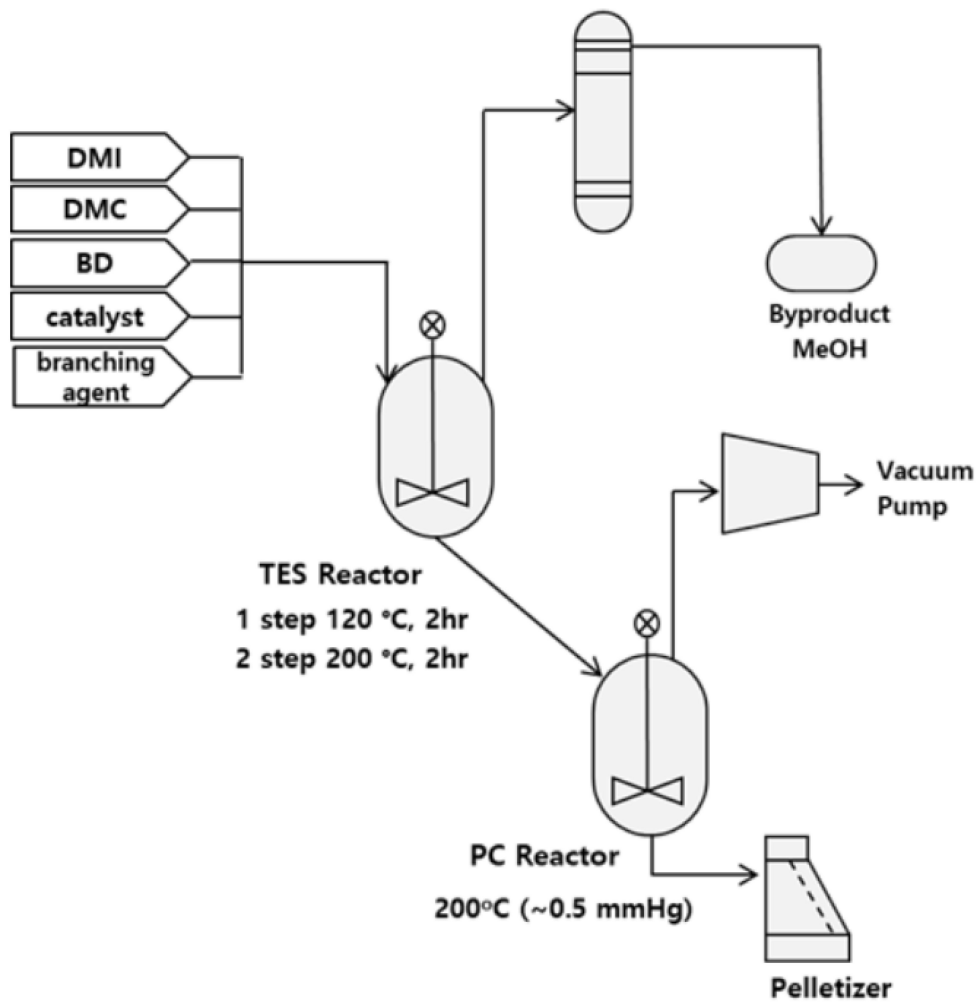

Supplement: d0gc01549k10.pdf [file d0gc01549k10.pdf]

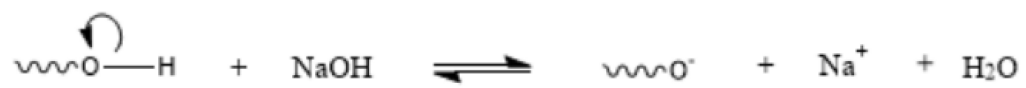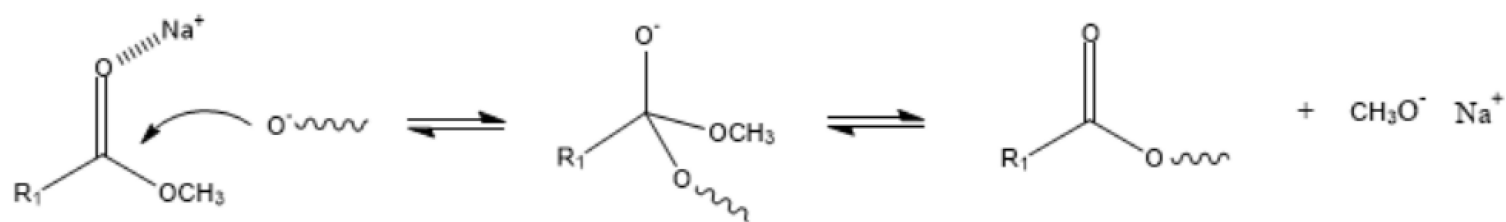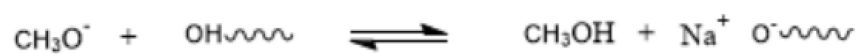

Supplement: d0gc01549k11.pdf [file d0gc01549k11.pdf]

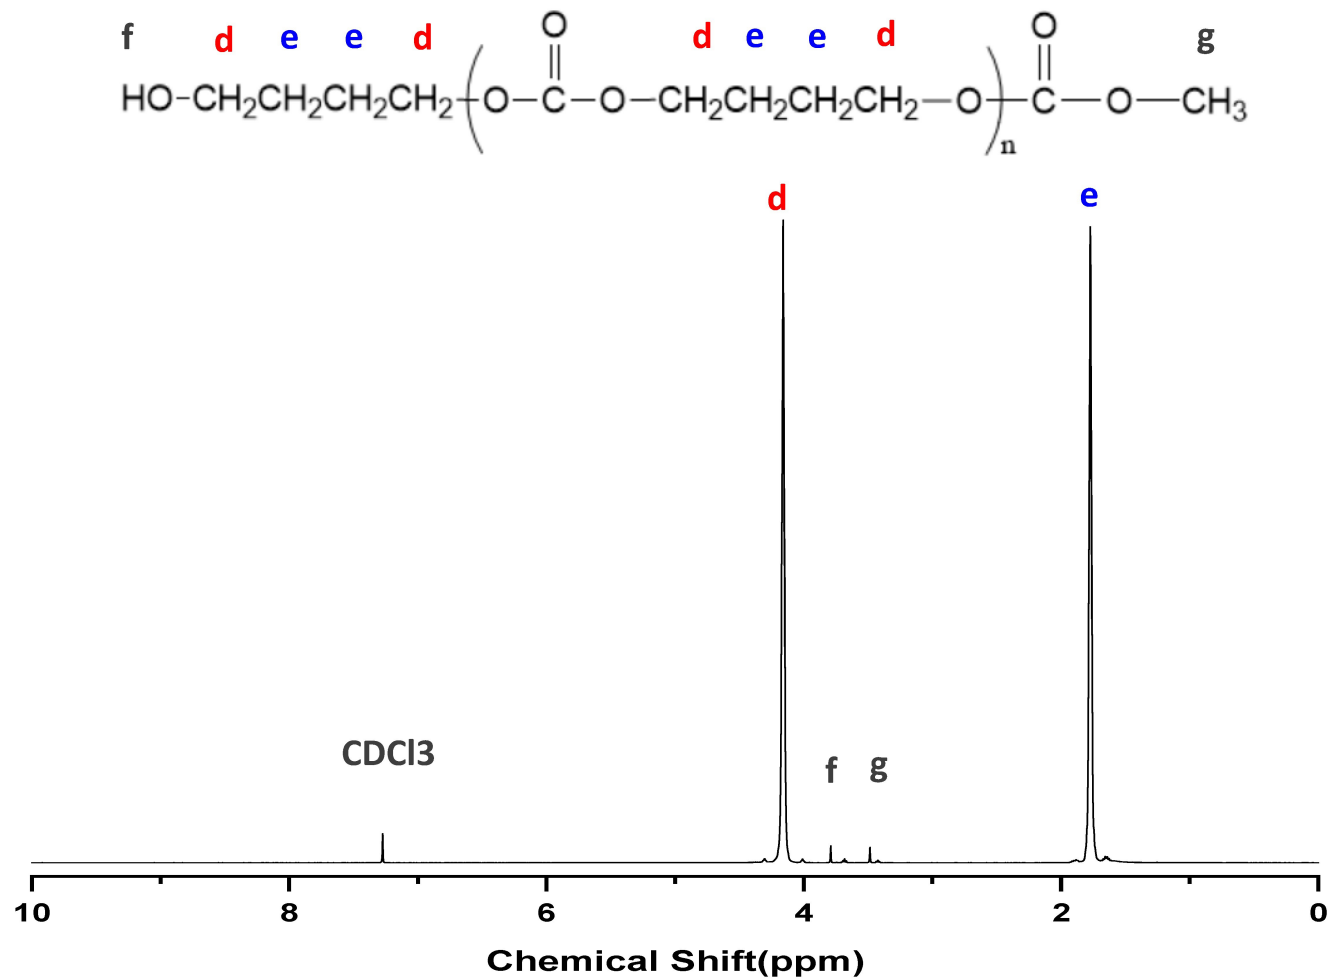

Supplement: d0gc01549k2.pdf [file d0gc01549k2.pdf]

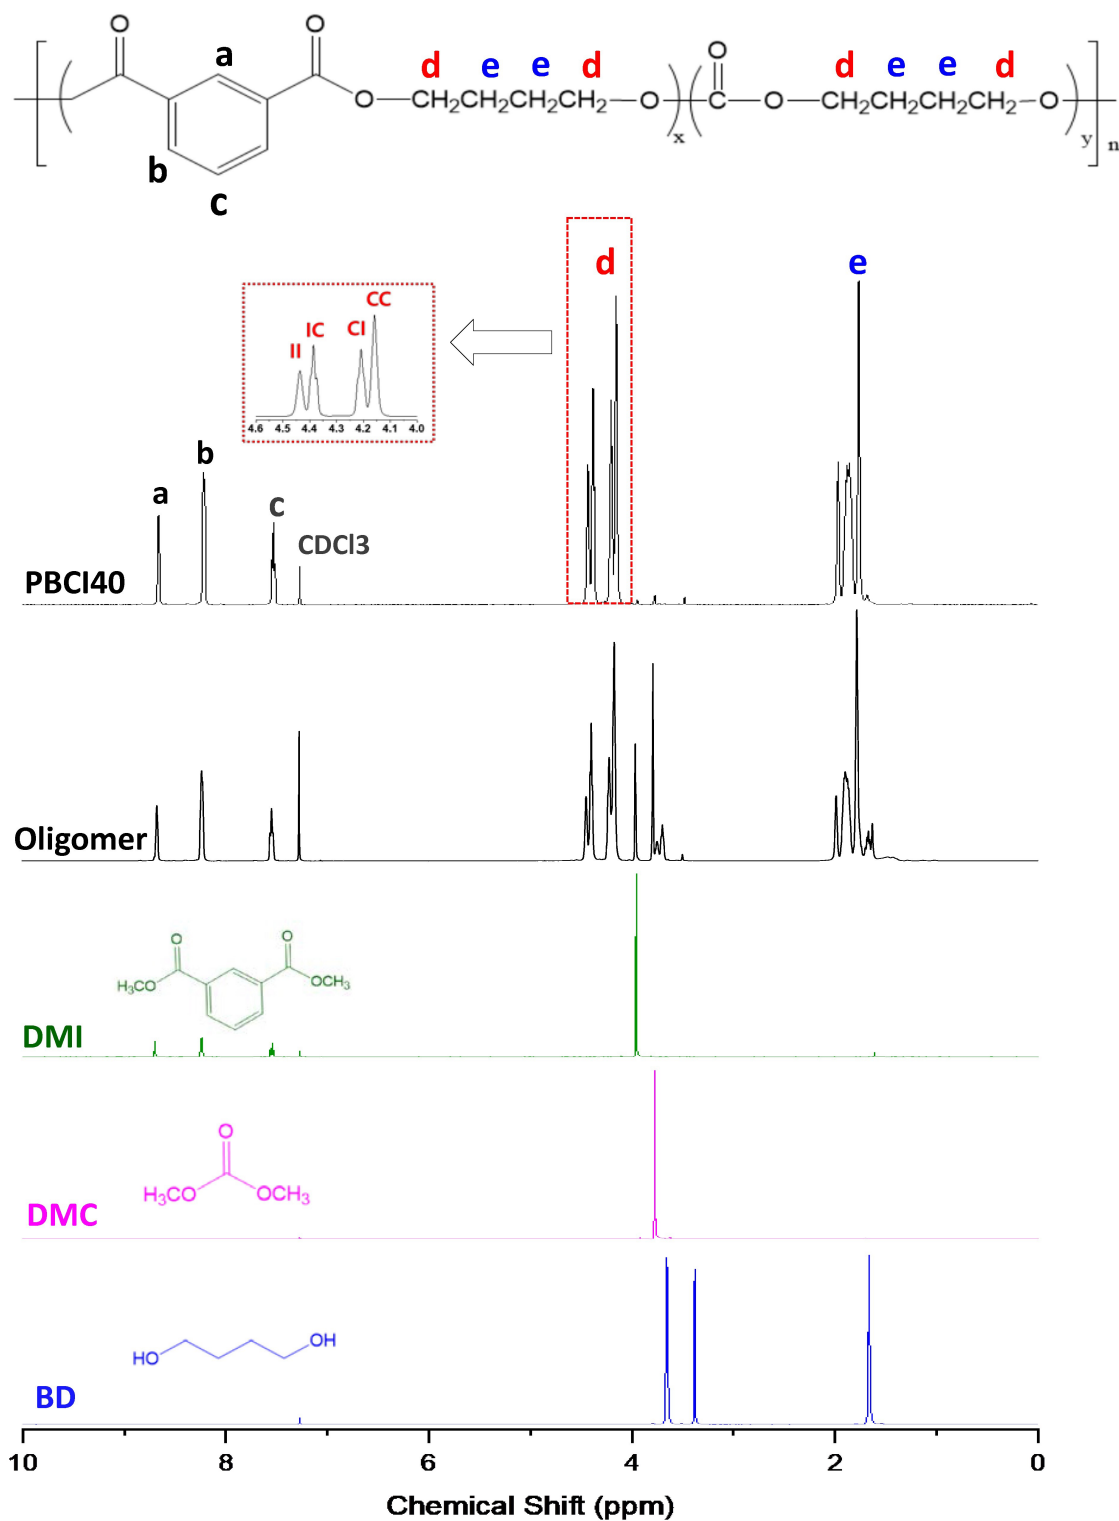

Supplement: d0gc01549k3.pdf [file d0gc01549k3.pdf]

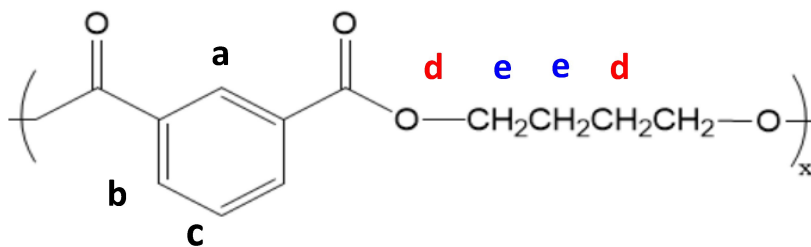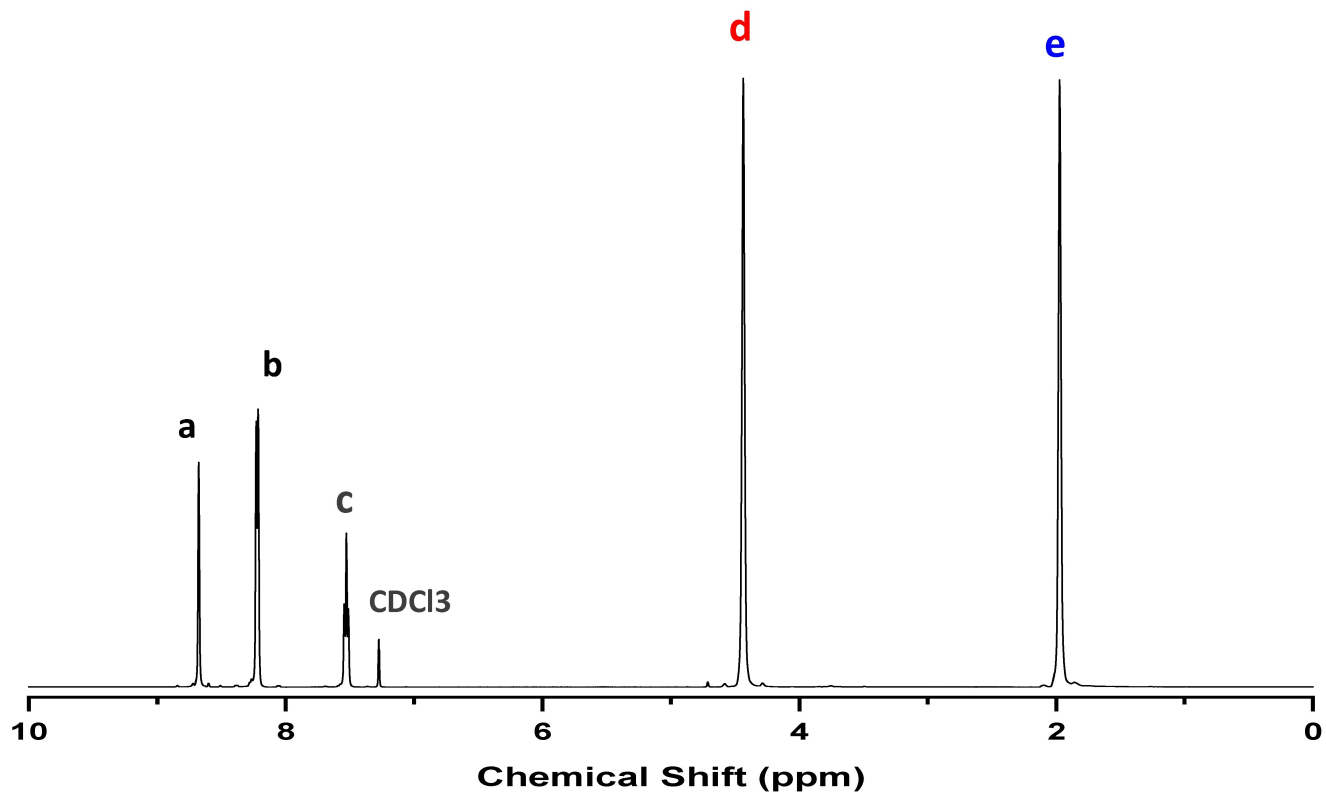

Supplement: d0gc01549k4.pdf [file d0gc01549k4.pdf]

|    | Chemical shift ( $\delta$ ) | Structural unit                                                                      |
|----|-----------------------------|--------------------------------------------------------------------------------------|
| II | 4.44 ppm                    | 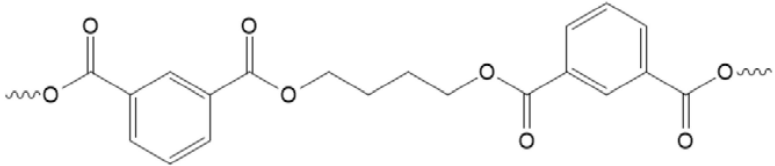   |
| IC | 4.38 ppm                    |    |
| CI | 4.15 ppm                    |   |
| CC | 4.09 ppm                    |  |

Supplement: d0gc01549k5.pdf [file d0gc01549k5.pdf]

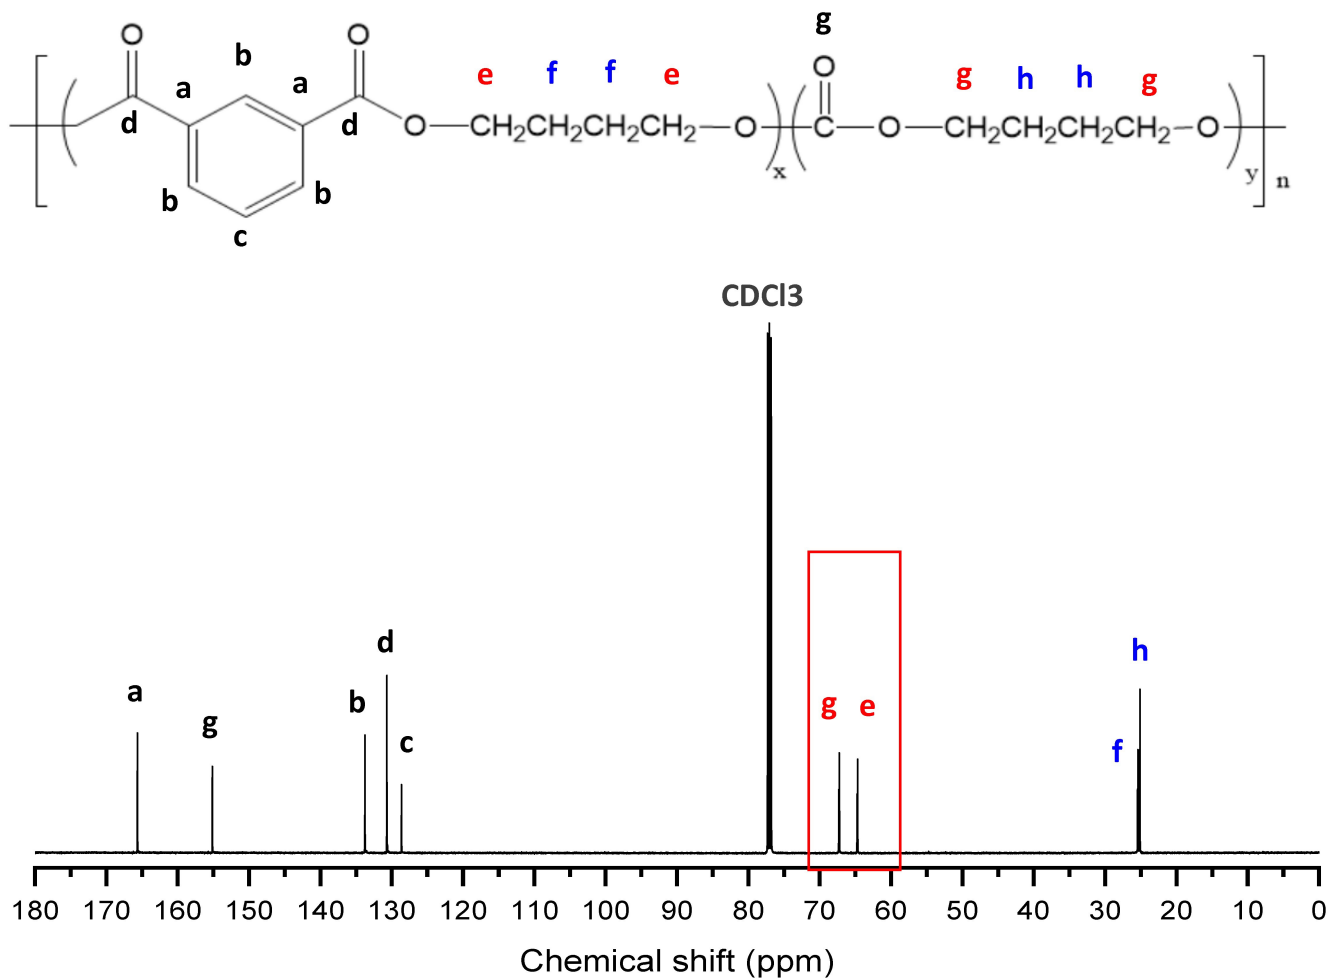

Supplement: d0gc01549k6.pdf [file d0gc01549k6.pdf]

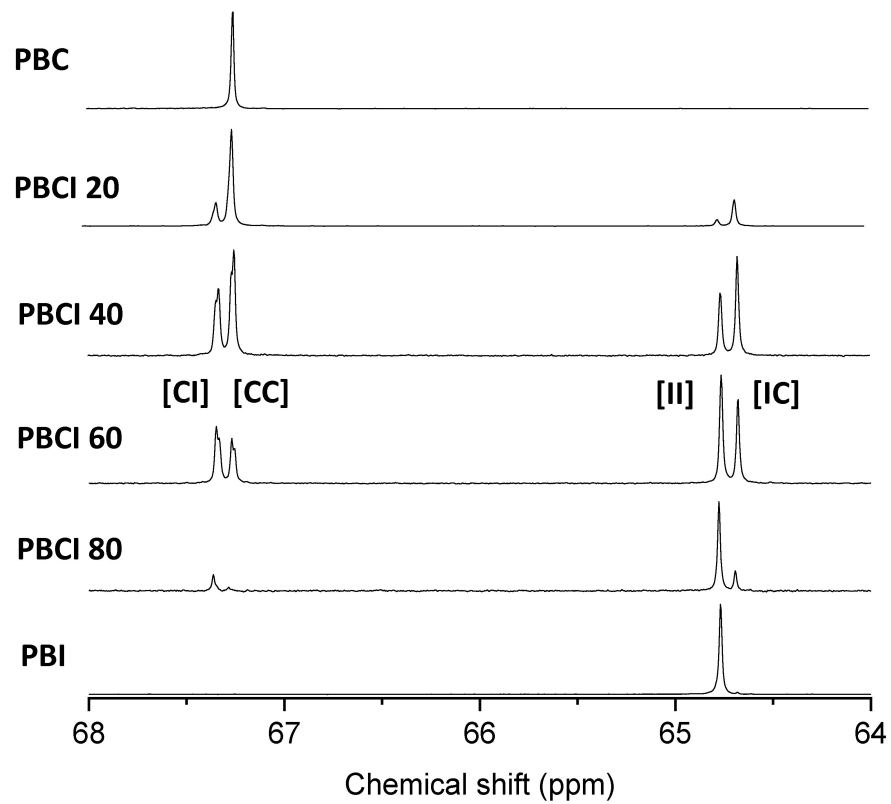

Supplement: d0gc01549k7.pdf [file d0gc01549k7.pdf]
